# Supplementary material for: Single electron transfer-induced Grignard cross-coupling involving ion radicals as exclusive intermediates
Source: Royal Society of Chemistry journal article supplement (doi:10.1039/c2cc37643a), 2012-11-15

## Supporting Information for Single Electron Transfer-Induced Grignard Cross-Coupling Involving Ion Radicals as Exclusive Intermediates

Nanase Uchiyama, Eiji Shirakawa,\* and Tamio Hayashi\*

**General Remarks.** All manipulations of oxygen- and moisture-sensitive materials were conducted with a standard Schlenk technique under a nitrogen atmosphere. Nuclear magnetic resonance spectra were taken on a JEOL JNM LA500 spectrometer ( $^1\text{H}$ , 500 MHz and  $^{13}\text{C}$ , 125 MHz) using tetramethylsilane ( $^1\text{H}$ ,  $^{13}\text{C}$ ) as an internal standard. High-resolution mass spectra were obtained with a Bruker Daltonics microTOF-Q spectrometer (APCI). GC spectra were taken on Shimadzu GC-2014. Preparative recycling gel permeation chromatography (GPC) was performed with JAI LC-908 equipped with JAIGEL-1H and -2H using chloroform as an eluent. Unless otherwise noted, reagents were commercially available and used without further purification. Toluene and tetrahydrofuran (THF) were purified by passing through an alumina/catalyst column system (GlassContour Co.). Aryl Grignard reagents were prepared in THF from the corresponding aryl bromides and magnesium turnings (99.95% purity trace metals basis, Aldrich Co., product number 403148). The result of ICP-AES analysis of the magnesium turnings and ICP-MS analysis of the toluene is disclosed in our previous report.<sup>1</sup> 2-Iodonaphthalene (**2m**),<sup>2</sup> phenylazo(triphenyl)methane (PAT),<sup>3</sup> and 2-(3-butenyl)phenyl iodide (**2n**)<sup>4</sup> were prepared according to literature methods.

### **Coupling Reaction of Phenylmagnesium Bromide with 2-Iodonaphthalene (eqn (2)).**

From a THF solution of phenylmagnesium bromide (**1a**: 0.98 M, 0.31 mL, 0.30 mmol) placed in a 15 mL pressure-resistant tube (Ace Pressure Tube, Ace Glass 864804), most of the solvent was removed in vacuo at 0.3 mmHg for 20 min. To the residue were added successively THF (97  $\mu\text{L}$ , 1.2 mmol), toluene (2.0 mL), and 2-iodonaphthalene (**2m**: 50.8 mg, 0.200 mmol), and the resulting mixture was stirred at 110  $^{\circ}\text{C}$  for 24 h. After cooling, the reaction mixture was quenched with  $\text{H}_2\text{O}$  (2 mL) and diluted with  $\text{Et}_2\text{O}$  (4 mL). Decane was added as an internal standard and an aliquot of the organic layer was subjected to GC analysis to determine the yields of 2-phenylnaphthalene (**3am**) and a regioisomeric mixture of 2-naphthyltoluenes (**4**).

**Reaction of *p*-Methoxyphenylmagnesium Bromide with Phenylazo(triphenyl)methane (eqn (3)).** From a THF solution of *p*-methoxyphenylmagnesium bromide (**1a**: 0.88 M, 0.45 mL, 0.40 mmol) placed in a 20 mL Schlenk tube, most of the solvent was removed in vacuo at 0.3 mmHg for 20 min. To the residue were added successively THF (97  $\mu\text{L}$ , 1.2 mmol) and toluene (2.0 mL), and the resulting mixture was warmed to 110  $^{\circ}\text{C}$ . After dropwise addition (10 min) of a toluene solution of phenylazo(triphenyl)methane (PAT: 0.050 M, 0.200 mL, 0.010 mmol), the resulting mixture was stirred at 110  $^{\circ}\text{C}$  for 50 min. After cooling, the reaction mixture was quenched with  $\text{H}_2\text{O}$  (2 mL) and diluted with  $\text{Et}_2\text{O}$  (4 mL). Decane was added as an internal standard and an aliquot of the organic layer was subjected to GC analysis to determine the

yields of 4-methoxybiphenyl (**5**) and a regioisomeric mixture of phenyltoluenes (**6**).

**Reaction of Phenylmagnesium Bromide with 2-(3-Butenyl)phenyl Iodide (eqn (4)).**

From a THF solution of phenylmagnesium bromide (**1a**: 0.95 M, 0.32 mL, 0.30 mmol) placed in a 20 mL Schlenk tube, most of the solvent was removed in vacuo at 0.3 mmHg for 20 min. To the residue were added successively THF (97  $\mu$ L, 1.2 mmol), toluene (2.0 mL), and 2-(3-butenyl)phenyl iodide (**2n**: 51.6 mg, 0.200 mmol), and the resulting mixture was stirred at 110 °C for 13 h. After cooling, the reaction mixture was quenched with H<sub>2</sub>O (2 mL) and extracted with Et<sub>2</sub>O (10 mL x 3). The combined organic layer was dried over MgSO<sub>4</sub>, filtered, and concentrated in vacuo. The residue was subjected to silica gel chromatography (hexane, PTLC) to give 2-(3-butenyl)biphenyl (**3an**: 33.6 mg, 90% yield, contaminated with 1.4 mg of biphenyl). Analytical data were obtained after further purification with GPC.

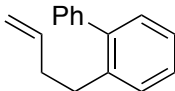 **2-(3-Butenyl)biphenyl (3an).** A colorless oil. <sup>1</sup>H NMR (500 MHz, CDCl<sub>3</sub>)  $\delta$  2.21 (q,  $J$  = 7.5 Hz, 2 H), 2.68 (t,  $J$  = 8.0 Hz, 2 H), 4.83–4.94 (m, 2 H) 5.71 (ddt,  $J$  = 17.1, 10.4, 6.7 Hz, 1 H), 7.19–7.26 (m, 2 H), 7.28–7.32 (m, 4 H), 7.34 (t,  $J$  = 7.4 Hz, 1 H), 7.41 (t,  $J$  = 7.3 Hz, 2 H). <sup>13</sup>C NMR (125 MHz, CDCl<sub>3</sub>)  $\delta$  32.6, 35.2, 114.7, 125.8, 126.8, 127.3, 128.0, 129.2, 130.1, 138.1, 139.2, 141.87, 141.94. HRMS (APCI) Calcd for C<sub>16</sub>H<sub>16</sub>: M<sup>+</sup>, 208.1252. Found: m/z 208.1257.

**Competition Reaction between *p*- and *o*-Tolylmagnesium Bromides with a 2-Halonaphthalene (Scheme 2).** From a THF solution of a mixture of *p*-tolylmagnesium bromide (**1c**: 0.92 M, 0.22 mL, 0.20 mmol) and *o*-tolylmagnesium bromide (**1d**: 0.93 M, 0.22 mL, 0.20 mmol) placed in a 20 mL Schlenk tube, most of the solvent was removed in vacuo at 0.3 mmHg for 20 min. To the residue were added successively THF (97  $\mu$ L, 1.2 mmol), toluene (2.0 mL), and a 2-halonaphthalene (**2m** or **2'm**: 0.20 mmol), and the resulting mixture was stirred at 110 °C for the time specified in Scheme 2. After cooling, the reaction mixture was quenched with H<sub>2</sub>O (2 mL). Decane was added as an internal standard and an aliquot of the organic layer was subjected to GC analysis to determine the yields of 2-(4-methylphenyl)naphthalene (**3cm**) and 2-(2-methylphenyl)naphthalene (**3dm**) and the conversion of **2**. After the reaction mixture was extracted with Et<sub>2</sub>O (10 mL x 3), the combined organic layer was dried over MgSO<sub>4</sub>, filtered, and concentrated in vacuo. The residue was subjected to <sup>1</sup>H NMR analysis using MeNO<sub>2</sub> as an internal standard to confirm the result obtained by the GC analysis.

**Reaction of Phenylmagnesium Bromide with 2-Bromonaphthalene in the Presence of a Substoichiometric Amount of Phenylazo(triphenyl)methane (Scheme 3).** From a THF solution of phenylmagnesium bromide (**1a**: 0.98 M, 0.41 mL, 0.40 mmol) placed in a 20 mL Schlenk tube, most of the solvent was removed in vacuo at 0.3 mmHg for 20 min. To the residue were added successively THF (97  $\mu$ L, 1.2 mmol), toluene (2.0 mL), and 2-bromonaphthalene (**2''m**: 41.4 mg, 0.200 mmol), and the resulting mixture was warmed to 80 °C. After addition of a toluene solution of phenylazo(triphenyl)methane (PAT: 0.080 M,

0.500 mL, 0.040 mmol), the resulting mixture was stirred at 80 °C for 12 h. After cooling, the reaction mixture was quenched with H<sub>2</sub>O (2 mL) and diluted with Et<sub>2</sub>O (4 mL). Decane was added as an internal standard and an aliquot of the solution was subjected to GC analysis to determine the conversion of **2''m** and the yield of 2-phenylnaphthalene (**3am**).

**Reaction of Phenylmagnesium Bromide with Cinnamyl Chloride (Scheme 4).** To a 20 mL Schlenk tube, were added successively a solution of phenylmagnesium bromide (**1a**: 0.98 M, 0.61 mL, 0.60 mmol), THF (0.39 mL), and cinnamyl chloride (**7**: 27.9 µL, 0.200 mmol), and the resulting mixture was stirred at 30 °C for 3 h. [In use of toluene as a solvent: from a THF solution of phenylmagnesium bromide (**1a**: 0.98 M, 0.61 mL, 0.60 mmol) placed in a 20 mL Schlenk tube, most of the solvent was removed in vacuo 0.3 mmHg for 20 min. To the residue were added successively THF (97 µL, 1.2 mmol), toluene (2.0 mL), and **7** (27.9 µL, 0.200 mmol), and the resulting mixture was stirred at 30 °C for 3 h.] After the reaction mixture was quenched with H<sub>2</sub>O (2 mL) and extracted with Et<sub>2</sub>O (10 mL x 3), the combined organic layer was dried over MgSO<sub>4</sub>, filtered, and concentrated in vacuo. The residue was subjected to <sup>1</sup>H NMR analysis using MeNO<sub>2</sub> as an internal standard to determine the yields of 1,3-diphenylpropene (**8**), (1*E*,5*E*)-1,6-diphenyl-1,5-hexadiene (**9**), (*E*)-1,4-diphenyl-1,5-hexadiene (**9'**), and biphenyl (**10**).

## References

- 1 E. Shirakawa, Y. Hayashi, K. Itoh, R. Watabe, N. Uchiyama, W. Konagaya, S. Masui, T. Hayashi, *Angew. Chem., Int. Ed.*, 2012, **51**, 218–221.
- 2 T. Satoh, K. Itoh, M. Miura, M. Nomura, *Bull. Chem. Soc. Jpn.*, 1993, **66**, 2121–2123.
- 3 R. G. Kryger, J. P. Lorand, N. R. Stevens, N. R. Herron, *J. Am. Chem. Soc.*, 1977, **99**, 7589–7600.
- 4 E. Negishi, C. Copéret, S. Ma, T. Mita, T. Sugihara, J. M. Tour, *J. Am. Chem. Soc.*, 1996, **118**, 5904–5918.

## **$^1\text{H}$ and $^{13}\text{C}$ NMR Data of Coupling Product 3an**

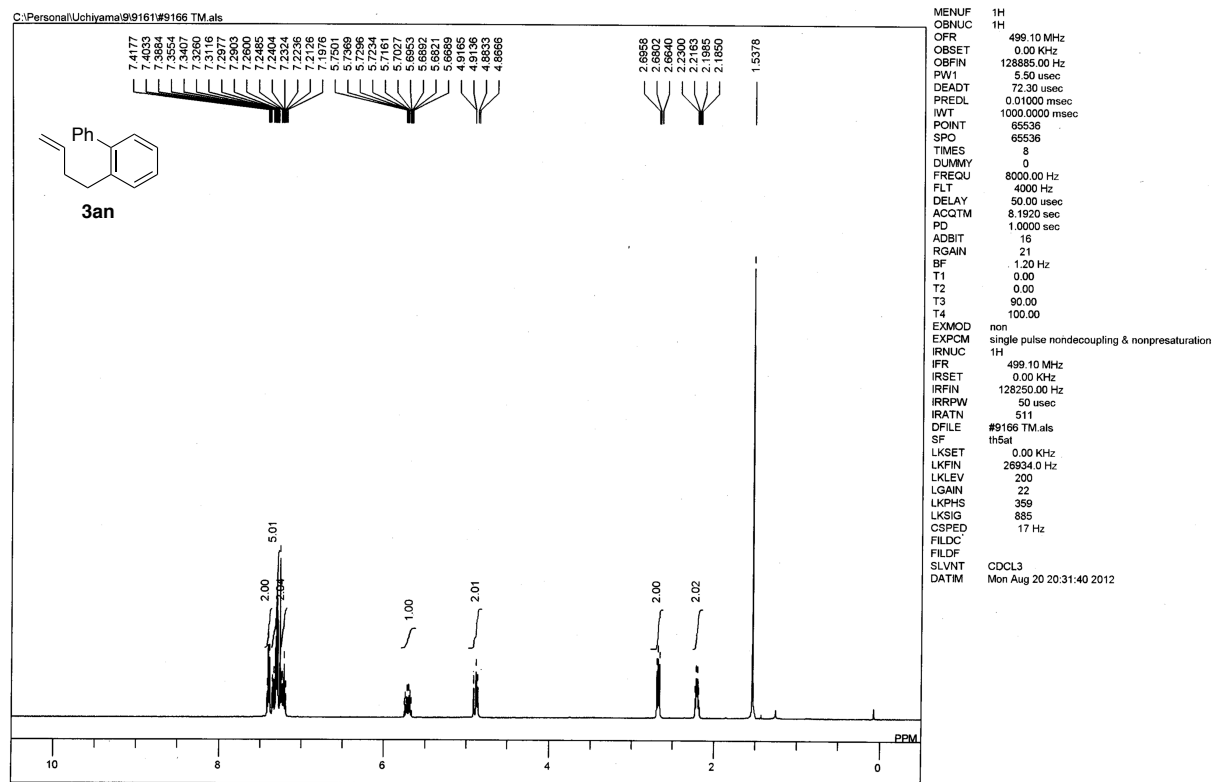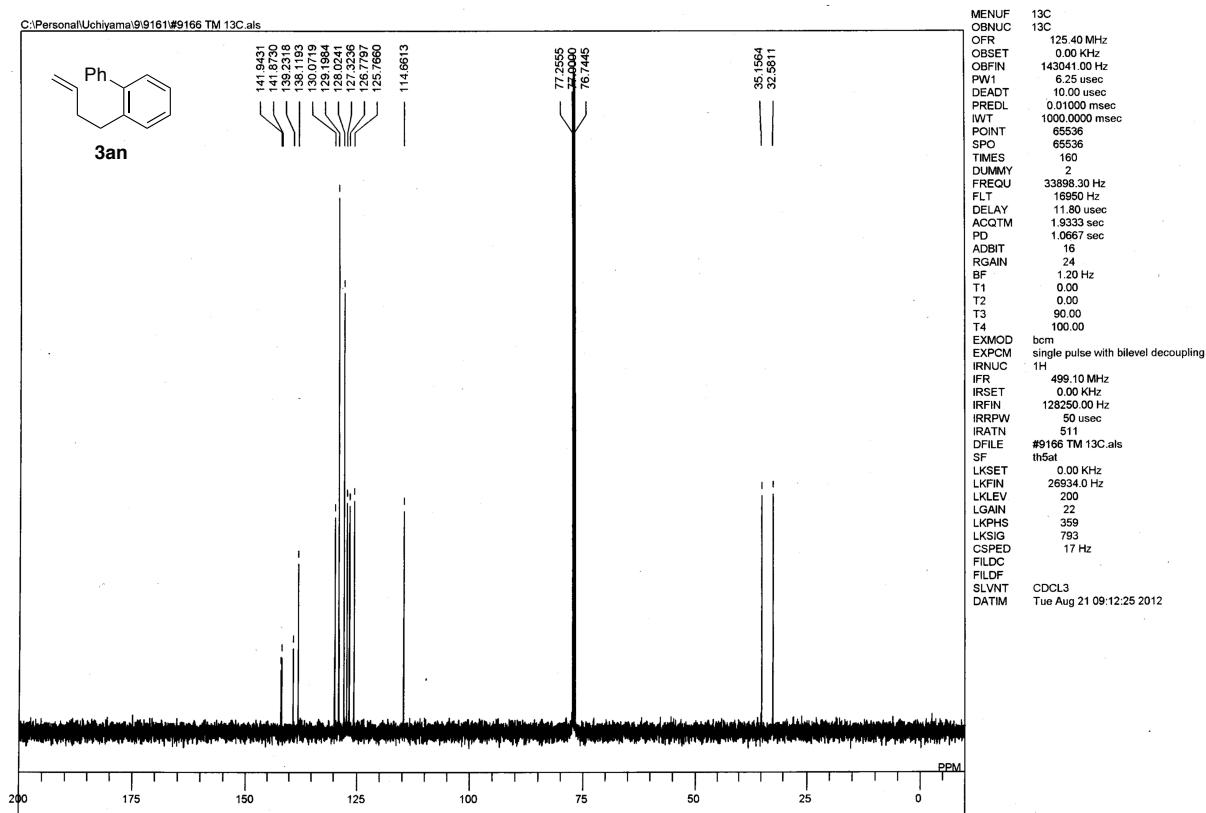

Supplement: c2cc37643a.pdf [file c2cc37643a.pdf]
